# Supplementary material for: Additive Manufacturing of Bulk Nanocrystalline FeNdB Based Permanent Magnets
Source: MDPI journal article supplement (doi:10.3390/mi12050538), 2021-05-10
Supplement: s1 [file s1]

## Supplementary Material S1

### EDX compositional analysis

To verify the composition of the as cast samples as well as of the phases, energy dispersive X-ray analysis (EDX) of the compositions was performed. The spectra were acquired at 20 kV acceleration voltage. Boron cannot be quantified using EDX analysis, unless the B content is very high (as it is the case for the Boride phase). To match the measurement results with the phases in the phase diagram, a theoretical composition of those phases without boron can be calculated. For the  $\phi$  phase this leads to a RE content of 11.76 at-%. This can then be compared to the EDX quantification results. In the same manner, the theoretical B content of the alloy compositions of 8.8 at-% has to be taken into account. Because of the similar atomic density, the  $\eta$  phase cannot be distinguished in the SEM images. Therefore it could not be measured using EDX.

**Table S1.** Results of the EDX compositional analysis: Sample P-RE-18 in the as cast state as presented in Figure 2a.

| 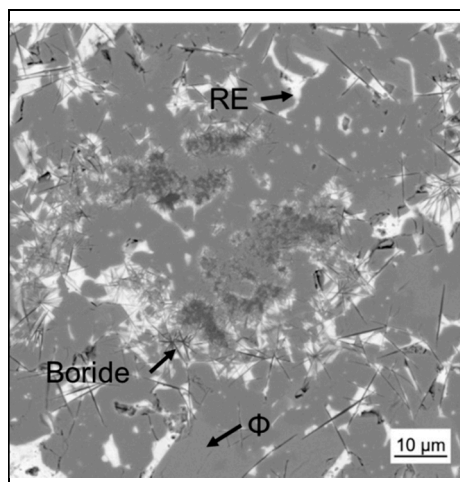 | Measuring spot | Nd [at-%] | Pr [at-%] | Zr [at-%] | Ti [at-%] | Fe [at-%] | Co [at-%] | B [at-%] |
|------------------------------------------------------------------------------------|----------------|-----------|-----------|-----------|-----------|-----------|-----------|----------|
|                                                                                    | 1: RE          | 68.3      | 8.3       | 3.6       | 2.2       | 12.6      | 5.0       | -        |
|                                                                                    | 2: $\phi$      | 10.6      | 0.8       | 0.4       | 1.3       | 84.9      | 2.0       | -        |
|                                                                                    | 3: Boride      | 3.1       | 0.4       | 9.9       | 9.2       | 9.6       | 0.5       | 67.3     |
|                                                                                    | Full area      | 18.3      | 1.8       | 3.0       | 2.9       | 71.4      | 2.6       | -        |

**Table S2.** Results of the EDX compositional analysis: Sample P-RE-12 in the as cast state as presented in Figure 2b.

| 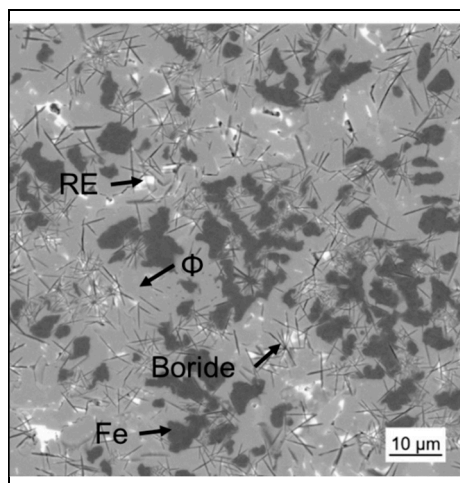 | Measuring spot | Nd [at-%] | Pr [at-%] | Zr [at-%] | Ti [at-%] | Fe [at-%] | Co [at-%] | B [at-%] |
|-------------------------------------------------------------------------------------|----------------|-----------|-----------|-----------|-----------|-----------|-----------|----------|
|                                                                                     | 1: $\phi$      | 10.1      | 0.8       | 4.0       | 0.8       | 82.0      | 2.3       | -        |
|                                                                                     | 2: Fe          | 0.8       | 0.1       | 3.4       | 1.0       | 92.9      | 1.8       | -        |
|                                                                                     | 3: RE          | 55.0      | 7.1       | 6.7       | 4.1       | 12.7      | 14.4      | -        |
|                                                                                     | 4: Boride      | 2.3       | 0.3       | 12.5      | 13.0      | 10.1      | 0.5       | 61.3     |
|                                                                                     | Full area      | 12.5      | 1.3       | 2.7       | 2.9       | 77.8      | 2.8       | -        |

**Table S3.** Results of the EDX compositional analysis: Sample P-RE-8 in the as cast state as presented in Figure 2c.

| 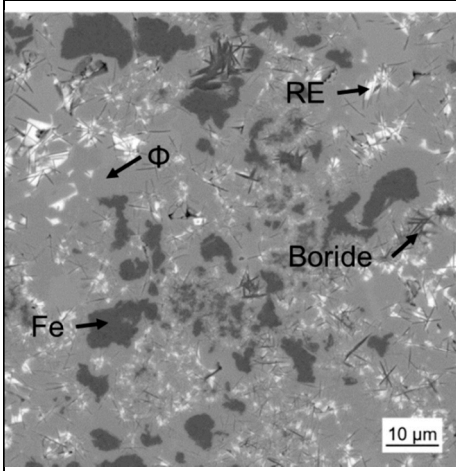 | Measuring spot | Nd [at-%] | Pr [at-%] | Zr [at-%] | Ti [at-%] | Fe [at-%] | Co [at-%] | B [at-%] |
|----------------------------------------------------------------------------------|----------------|-----------|-----------|-----------|-----------|-----------|-----------|----------|
|                                                                                  | 1: $\phi$      | 0.7       | -         | -         | 1.0       | 96.2      | 2.1       | -        |
|                                                                                  | 2: Fe          | 10.5      | 1.0       | 0.3       | 1.0       | 83.8      | 3.4       | -        |
|                                                                                  | 3: RE          | 36.6      | 5.3       | 15.9      | 9.9       | 22.8      | 9.5       | -        |
|                                                                                  | 4: Boride      | 2.2       | 0.3       | 10.1      | 8.2       | 18.9      | 0.7       | 59.6     |
|                                                                                  | Full area      | 8.9       | 0.9       | 2.8       | 2.9       | 81.7      | 2.8       | -        |

### XRD analysis of 3D printed parts

The presence of  $\phi$  phase in the three different 3D-printed parts was verified by XRD analysis of the 3D-printed parts. For P-RE-8 also the  $\alpha$ -Fe phase was verified.

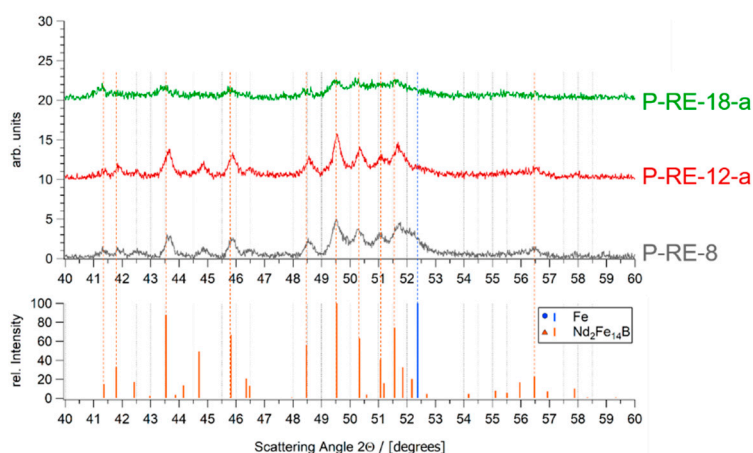**Figure S1.** Diffractograms of the three additively manufactured samples P-RE-18-a, P-RE-12-a, P-RE-8. Detected phases  $\alpha$ -Fe and 14:2:1 ( $\phi$ ) with their corresponding peaks are shown below.

### Thermomagnetic analysis of 3D printed parts

To verify the existence of  $\phi$  phase, the Curie temperature has been used. From magnetization versus temperature magnetometry measurements a Curie temperature of  $T_c = 565$  K has been determined, which exclusively fits to the hard magnetic  $\phi$  phase. The obtained values of  $T_c = 587$  K for P-RE-12 and of  $T_c = 580$  K for P-RE-8 again only fit to the  $\phi$  phase. For P-RE-8 there occurs a remaining magnetization in the sample after heating above 585 K. This is due to the existence of a ferromagnetic phase of higher Curie temperature. The only possible ferromagnetic phase showing a Curie temperature higher than 585 K and that can form for the given composition is  $\alpha$ -Fe.

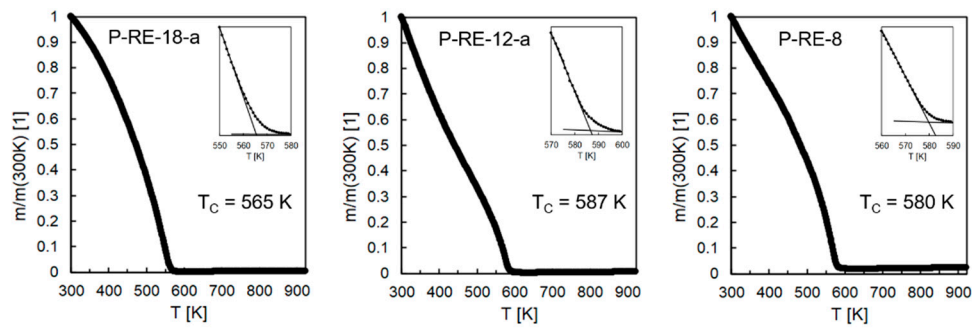

**Figure S2.** Thermomagnetic measurements of the three additively manufactured samples P-RE-18-a, P-RE-12-a, P-RE-8. Measured Curie temperature  $T_C$  of the hard magnetic  $\phi$  phase is noted in the diagrams.
